# Supplementary material for: Submarine Active Faults and Morpho-Tectonics Around the Iberian Margins: Seismic and Tsunamis Hazards
Source: Frontiers journal article supplement (doi:10.3389/feart.2021.653639), 2021-06-30
Supplement: Table_1.DOCX [file Table_1.DOCX]

Supplementary Table 1: Technical specifications of the oceanographic cruises used in this work and online references to cruise reports.

| **Zone** | **Cruise** | **Year** | **Research Vessel** | **Chief of Cruise** | **Multibeam echosounders**  **(MBEs) types** | **Sub-bottom profiler**  **(SBP)** | **Multichannel seismic**  **(MCS)** | **Cruise reference** |
| --- | --- | --- | --- | --- | --- | --- | --- | --- |
| **GALICIA** | **Spanish EEZ Mapping Programme** | ZEE-2001  ZEE-2002  ZEE-2003 | *Hespérides* |  | Simrad EM-12S  13 kHz  Angular coverage=120º  81 beams per ping  Coverage 2.5 times the water depth | TOPAS |  |  |
| ZEE-2006  ZEE-2007  ZEE-2008 | *Hespérides* |  | Simrad EM-12S  13 kHz  Angular coverage=120º  81 beams per ping  Coverage 2.5 times the water depth | TOPAS |  |  |
| **BREOGHAM** | 2005 | *Hespérides* | Luis Somoza | Konsberg EM-120  12 kHz  Angular coverage=150º  191 beams per ping  Coverage 3-4 times the water depth | TOPAS PS18 | Seismic source: six BOLT™ guns (1500 LL model) and two SLEEVE™ guns. Total capacity of 22.85 L.  Receiving system: analogical TELEDYNE™ (40508 model) streamer, 7.5 cm in diameter, composed of 24 active sections of 100 m length, with a toatal length of 2400 m. | Somoza et al., 2005 |
| **GULF OF CÁDIZ** | **MOUNDFORCE** | 2007 | *L´Atalante* | Luis Somoza | KONSBERG EM-12 dual  13 kHz  Angular coverage=150º  162 pings per ping  Coverage 7.3 time the water deprh | 3.5 kHz CHEOPS | Seismic source: Array of 14-16 guns G.I. GUN and BOLT. Total volume= 56.5 L (3449 cubic inches). Shooting interval=50-75 m.  Streamer: SERCEL 360 channels. 7.5 cm diameter. Active sections= 4,000 m. Total length5,000 m. Depth=15 m.  Recording: Recording length=15-20 s. SEG_D. DLT magnetic tapes | Somoza et al., 2007 |
|  | **MVSEIS** | 2008 | *Hespérides* | Luis Somoza | Konsberg EM-120  12 kHz  Angular coverage=150º  191 beams per ping  Coverage 3-4 times the water depth | TOPAS PS18 |  | Somoza et al., 2008 |
|  | **SUBVENT-2** | 2014 | *Sarmiento de Gamboa* | Luis Somoza | Atlas DS 1x1  14-16 kHz  Angular coverage= 140º  360 beams per ping  Coverage 5.5 times the water depth | ATLAS PARASOUND  P-35 |  | Somoza et al., 2014 |

**CRUISE REFERENCES (AVAILABLE ONLINE)**

Somoza, L.; Ayala, C.; Bárcenas, P.; Berndt, J.; Bohoyo, F.; Fernández, F.; Fernádez-Puga, MC.; Gómez, M.; González, J.; Hernández-Molina, FJ.; Langlois, E.; Litcheva, E.; Maestro, A.; Medialdea, T.; Murray, B.; Paniagua, A.; Patriat, M.; Sánchez, G.; Vázquez, JT; (2005). *Informe Científico Campaña BREOGHAM*, *Hespérides*, 2005, 319 pp. <https://doi.org/10.20351/29HE20050906>

Somoza, L. *MOUNDFORCE cruise, RV L'Atalante*, 2007. <https://doi.org/10.17600/7010160>

Somoza et al. (2008). *Informe Técnico Campaña MVSEIS-2008, R/V Hespérides* (2008). Available online: <http://info.igme.es/SidPDF/143000/119/143119_0000001.pdf>

Somoza, L.; Vázquez, J.T.; Campos, A.; Afonso, A.; Calado, A.;  Fernández-Puga, M.C.; González, F.J.; Fernández‐Salas, L.M.; Ferreira, M.; Sanchez-Guillamón, O.;  López-Pamo, E.; Lourenço, N.;  Luque, V.; Mamouni, A.;  Medialdea, C.; Madureira, P.; Palomino, D.; Rincón Tomás, B.; Roque, C.; Bettencourt, R.P.; Toyos, M. *Informe Científico-Técnico Campaña SUBVENT-2,* 2014*,* 43 pp. Available online: <http://info.igme.es/SidPDF/166000/941/166941_0000001.pdf>
