# Supplementary material for: Submarine Active Faults and Morpho-Tectonics Around the Iberian Margins: Seismic and Tsunamis Hazards
Source: Frontiers journal article supplement (doi:10.3389/feart.2021.653639), 2021-06-30
Supplement: Table_2.DOCX [file Table_2.DOCX]

**Table 2: List of abbreviations**

**Offshore Quaternary active faults (By alphabetical order)**

**AF** Adra Fault

**AIFS** Al Idrisi Fault System

**AMF** Alhama Murcia Fault

**ARF** Alborán Ridge Fault

**ArrF** Arrabida Fault

**AVF** Averroes Fault

**BSZ** Burato Shear Zone

**CRF** Coruña Fault

**CSF** Castelao Fault

**CHSF –**Calahonda Sound Fault

**CRSF** Coruña Seamount Fault

**DVSF** Djibouti Ville Seamount Fault

**DPF** Djibouti Passage Fault

**EBF** Estaca de Bares Fault

**EGBF** Eastern Galicia Bank Fault

**FRF** Ferrol Fault

**FSF** Finisterre Seamount Fault

**HF** Horseshoe Fault

**HSF** La Herradura Sound Fault

**JF** El Jebha Fault

**GF** Gorringe Fault

**GBF** Guadalquivir Bank Fault

**LF** Larache Fault

**MDF** Motril-Djibouti Fault System

**MD-2** Motril Djibouti Fault-2

**MF** Maro-Nerja Fault

**MLF** Malpica Fault

**MPF** Marques de Pombal Fault

**NGoCs** North Gulf of Cádiz Shear Zone

**NzF** Nazaré Fault

**OF** Ortegal Fault

**PF** Portimao Fault

**PAF** Palomares Fault

**S-CF** La Serrata**-**Carboneras Fault

S**GoCs** South Gulf of Cádiz Shear Zone

**SMF** South Mallorca Fault

**TF** Torrevieja Fault

**XCS** Xauen Compressive System

**VF** Ventaniella Fault

**YF** Yusuf Fault

**Seafloor morphological features**

**AUGC:** Allochthonous Unit of the Gulf of Cádiz

**CSm**= Coruña Seamount

**DGM**= Deep Galicia Margin;

**EBE** Emile Baudot Escarpment

**FSm** Finisterre Seamount

**GB**=Galicia Bank

**GIB**= Galicia Interior Basin

**GoC** Gulf of Cádiz

**JCSm** Jean Charcot Seamount

**MO**=Magnetic anomaly MO

**PR**= Peridotite Ridge

**SMA** South Moroccan Arc

**TP**=Theta Passage

**Onshore faults**

**BT** Bajo Tagus

**LG** Guadiana lineaments

**APF** As Pontes Fault

**MRM** Meirama Fault

**SFV**= Vilarica fault system
